# Supplementary material for: Human Retinal Organoid Model of Disease-Relevant Photoreceptor Cell Death Amenable to Drug Screening
Source: Research Square preprint supplement (doi:10.21203/rs.3.rs-6719851/v1), 2025-06-06
Supplement: Supplementary file 1 [file a05b6466b5622b1da6feff94.pdf]

## **Supplementary Information**

### **Human Retinal Organoid Model of Disease-Relevant Photoreceptor Cell Death Amenable to Drug Screening**

Shama Parween, Anthony J. Saviola, Anna C. Howell, Stefanie Varghese, David Ceja Galindo, and M. Natalia Vergara

#### **Contents:**

- Figure S1 and legend: Confocal images and corresponding quantification of Day 180 human ROs treated with CSE 500 µg/ml for 5 days, assessing photoreceptor and cell death markers.
- Figure S2 and legend: Proteomic analysis of ROs treated with CSE 750 µg/ml for 48 h.
- Tables S1 and S2: Lists of primary and secondary antibodies used for immunofluorescence studies.

**Figure S1. Apoptosis induction in CSE-treated ROs**

**S.1A**

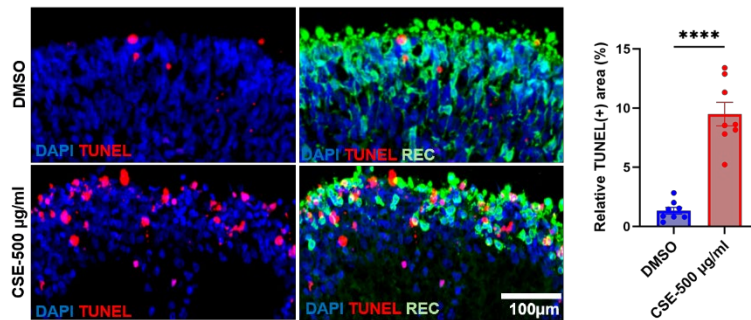

**S.1B**

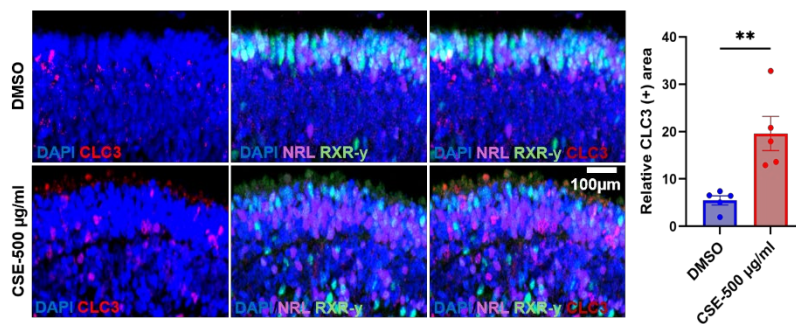

ROs were treated with vehicle control (DMSO) or CSE-500 µg/ml for 5 days to evaluate the extent of apoptotic cell death:

- A. A representative confocal micrographs of D180 RO sections stained with TUNEL to examine DNA fragmentation, along with recoverin (REC) staining to identify photoreceptor cells. Scale bar: 100µm. TUNEL staining quantification shows a statistically significant increase in cell death in CSE-treated ROs compared to vehicle controls (DMSO). Relative TUNEL (+) area: DMSO: 1.342±0.28 (n=8), and CSE-500 µg/ml: 9.501±0.988 (n=8). Error bars indicate Mean±SEM; T-test; \*\*\*\*p<0.0001.
- B. Immunofluorescence staining was performed on D180 RO sections using antibodies for CLC3 and photoreceptor markers NRL (Rod) and RXR-γ (Cone). Colocalization of CLC3 and photoreceptor markers was also analyzed. Scale bar: 100µm. Bar graph represents the quantification of relative CLC-3-labeled area/DAPI. A significant increase in CLC3-mediated

photoreceptor cell death was observed in CSE-treated ROs compared to vehicle controls (DMSO). DMSO=  $5.483 \pm 0.95$  (n=5), and CSE-500  $\mu\text{g/ml}$ =  $19.622 \pm 3.599$  (n=5). Error bar shows Mean $\pm$ SEM; T-test; \*\*p<0.005.

Figure S2. Proteomic analysis of ROs treated with CSE-750 µg/ml or DMSO for 48 h

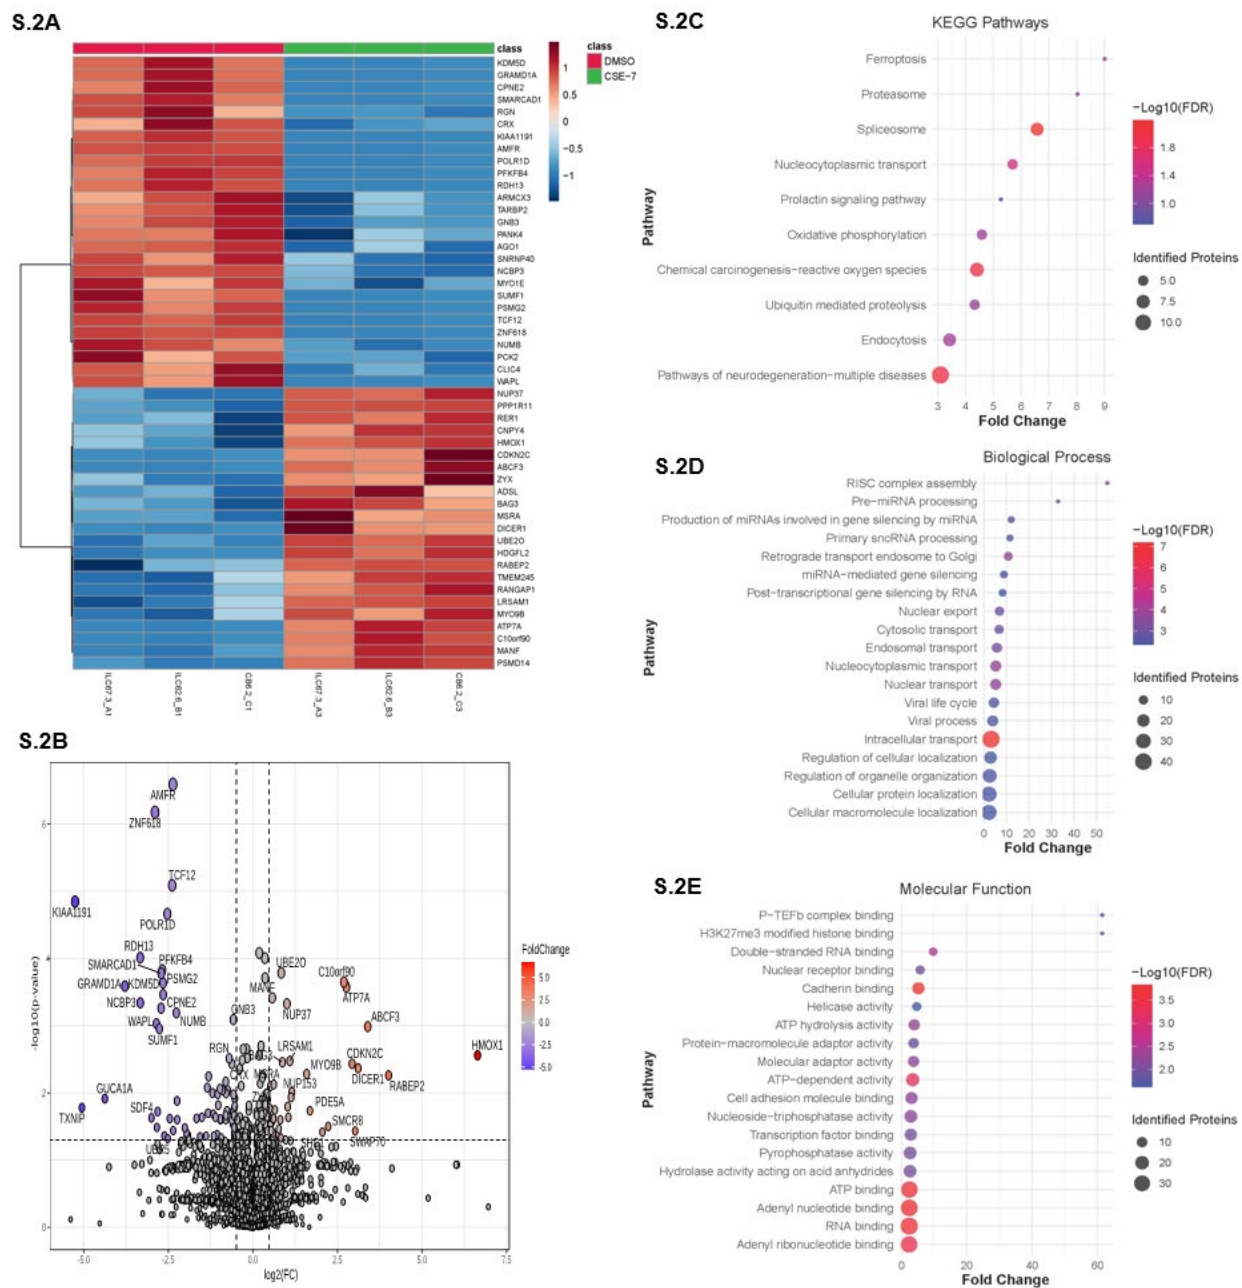

LC-MS proteomic analysis of ROs treated with CSE-750 µg/ml show very similar results to those observed in ROs treated with CSE-500 µg/ml, along with several additional DEPs.

A. Heatmap and hierarchical clustering representation of the top 50 DEPs across three independent hiPSC cell lines (ILC67.3, ILC62.6, and CB6.2), comparing DMSO and CSE-

750 µg/ml treatments. Each column represents an individual sample, and clustering reflects distinct proteomic signatures induced by CSE exposure.

- B. Volcano plot illustrating differential protein expression between CSE (750 µg/mL) and vehicle (DMSO) control-treated ROs. The x-axis represents the log<sub>2</sub> fold change (log<sub>2</sub>FC), and the y-axis represents the statistical significance (−log<sub>10</sub> p-value). A total of 80 significant proteins (Fold Change ≥ 1.4, p < 0.05) were plotted. Black dots indicate non-significant changes; blue and red dots indicate significantly downregulated and upregulated proteins, respectively.
- C. KEGG pathway enrichment analysis of DEPs revealed significant enrichment in pathways associated with ferroptosis, metabolic pathways, neurodegeneration, and others in CSE-treated ROs compared to vehicle (DMSO) control-treated ROs.
- D. Gene Ontology (GO) Biological Process analysis identified key functional categories significantly associated with DEPs in CSE-treated ROs, highlighting pathways involved in autophagy, mRNA processing, and cellular processes.
- E. GO Molecular Function analysis revealed enrichment in molecular activities such as antioxidant activity, receptor binding, and protein transport among the DEPs following CSE exposure.

**Table S1.** Primary Antibody Information

| Primary antibody           | Company/State/Country                       | Catalog Number | Dilution |
|----------------------------|---------------------------------------------|----------------|----------|
| Recoverin                  | Millipore, Burlington, MA, USA              | AB5585         | 1:1000   |
| Human NRL                  | R&D Systems; NE, Minneapolis, MN, USA.      | AF2945         | 1:300    |
| RXR- $\gamma$ (A-2)        | Santa Cruz, CA, USA                         | Sc-365252      | 1:100    |
| Cleaved Caspase 3 (Asp175) | Cell Signaling Technology; Danvers, MA, USA | 9664           | 1:500    |
| Cleaved Caspase 9 (Asp330) | Cell Signaling Technology; Danvers, MA, USA | 7237           | 1:500    |

**Table S2. Secondary Antibody information**

| <b>Secondary antibody</b>                                                                        | <b>Company</b>                                | <b>Catalog<br/>Number</b> | <b>Dilution</b> |
|--------------------------------------------------------------------------------------------------|-----------------------------------------------|---------------------------|-----------------|
| Donkey anti-Rabbit IgG (H+L)<br>Highly Cross-Adsorbed<br>Secondary Antibody, Alexa<br>Fluor™ 594 | Thermo Fisher Scientific;<br>Waltham, MA, USA | A21207                    | 1:2000          |
| Donkey anti-Mouse IgG (H+L)<br>Highly Cross-Adsorbed<br>Secondary Antibody, Alexa<br>Fluor™ 594  | Thermo Fisher Scientific;<br>Waltham, MA, USA | A21203                    | 1:2000          |
| Donkey anti-Rabbit IgG (H+L)<br>Highly Cross-Adsorbed<br>Secondary Antibody, Alexa<br>Fluor™ 488 | Thermo Fisher Scientific;<br>Waltham, MA, USA | A21206                    | 1:2000          |
| Donkey anti-Mouse IgG (H+L)<br>Highly Cross-Adsorbed<br>Secondary Antibody, Alexa<br>Fluor™ 488  | Thermo Fisher Scientific;<br>Waltham, MA, USA | A32766                    | 1:2000          |
| Donkey anti-Goat IgG (H+L)<br>Highly Cross-Adsorbed<br>Secondary Antibody, Alexa<br>Fluor™ 647   | Thermo Fisher Scientific;<br>Waltham, MA, USA | A21447                    | 1:2000          |
